# Supplementary material for: Partially pyridine-functionalized quantum dots for efficient red, green, and blue light-emitting diodes
Source: Royal Society of Chemistry journal article supplement (doi:10.1039/c8tc04414g), 2019-01-01
Supplement: c8tc04414g1.pdf [file c8tc04414g1.pdf]

## Supporting Information

# Partially Pyridine-Functionalized Quantum Dots for Efficient Red, Green, and Blue Light-Emitting Diodes

Sukyung Choi, Jaehyun Moon, Hyunsu Cho, Byoung-Hwa Kwon, Nam Sung Cho, and  
Hyunkoo Lee\*

*Flexible Device Research Group, Electronics and Telecommunications Research Institute  
(ETRI), Daejeon 34129, Republic of Korea*

*\* Corresponding E-mail: [lhk108@etri.re.kr](mailto:lhk108@etri.re.kr)*

## *Experimental*

*Materials:* QDs (NANOSQUARE INC.), zinc acetate hydrate (Sigma-Aldrich), tetramethylammonium hydroxide (Sigma-Aldrich), ethyl acetate (JUNSEI), 2-ethanolamine (Sigma-Aldrich), and pyridine (Sigma-Aldrich).

*Synthesis of ZnO nanoparticles:* Colloidal ZnO nanoparticles were synthesized according to a previously reported method with a few modifications.<sup>9</sup> Zinc acetate hydrate was dissolved in dimethyl sulfoxide and mixed with tetramethylammonium hydroxide in ethanol (molar ratio, 1: 1.8) and stirred overnight at room temperature. Then, the ZnO nanoparticles were precipitated by adding ethyl acetate as an antisolvent. The precipitate was redispersed in alcohol (methanol or ethanol) and 2-ethanolamine was added as surface ligands for the ZnO nanoparticles. After the washing step to remove excess ligands, ZnO nanoparticles were redispersed in ethanol at an appropriate concentration.

*Fabrication of QD-LED devices:* The patterned ITO glass substrates were successively cleaned with acetone, methanol, and water. For obtaining the ZnO layer, a suspension of ZnO nanoparticle in ethanol (50 mg/ml) was spin-coated at 2000 rpm onto the ITO-coated glass substrates after filtering through a 0.1- $\mu$ m PTFE filter and then baked at 100 °C for 30 min. After that, the QD suspension in toluene (20 mg/ml) was spin-coated at 4000 rpm and annealed at 80 °C for 30 min under nitrogen environment. For surface ligand exchange, liquid pyridine was dropped onto the QD layer and spin-dried. Then, the film was washed with methanol and annealed at 80 °C for 30 min under nitrogen environment. Subsequently, 4,4',4''-tris-(carbazol-9-yl)triphenylamine (TCTA), MoO<sub>3</sub>, and Ag layers were successively deposited by a thermal evaporation method. The fabricated inverted bottom-emission QD-LEDs were encapsulated by

a glass cap with a moisture absorbent using a UV-curable epoxy resin. The emission area of the devices was  $2 \times 2 \text{ mm}^2$ .

*Measurements and characterizations:* The absorbance was measured on a UV/VIS/NIR spectrometer (PerkinElmer Lambda 750), and a NICOLET 6700 spectrometer was employed to record the Fourier transform infrared (FTIR) spectra. A Cs-corrected scanning transmission electron microscopy (TEM) by ZEOL was used to acquire the cross-sectional images of the QD-LEDs. TEM samples were prepared by focused ion beam (FIB) micromachining. UPS spectra were recorded on a Micro X-Ray/UV Photoelectron Spectrometer (AXIS NOVA, Ultra DLD) with a He I (21.2 eV) UV source. The Photoluminescence (PL) and Time-resolved PL were measured by HORIBA Fluorog3 with TCSPC (time-correlated single photon counting). The excitation light source was 374 nm pulsed laser diode. The current density-voltage-luminance (J-V-L) characteristics of the QD-LEDs were determined using a Keithley-238 source-measure unit, and Konica Minolta spectroradiometer (Model CS-2000) at room temperature in a dark room.

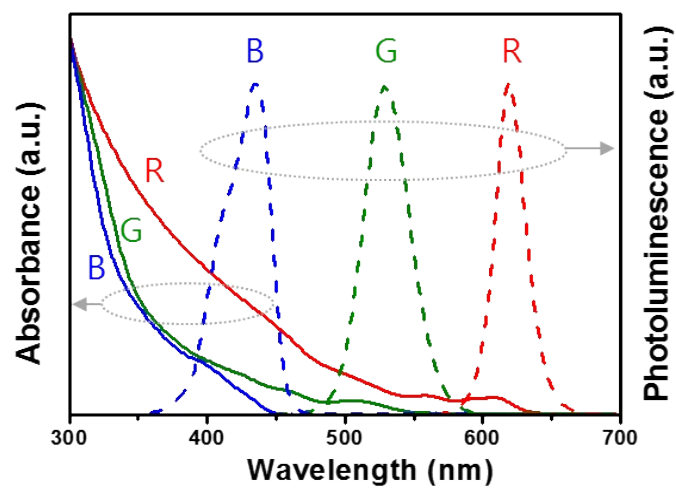

**Figure S1.** Normalized absorption spectra and photoluminescence spectra of red(R)-, green(G)-, and blue(B)-emitting quantum dots in the colloidal states.

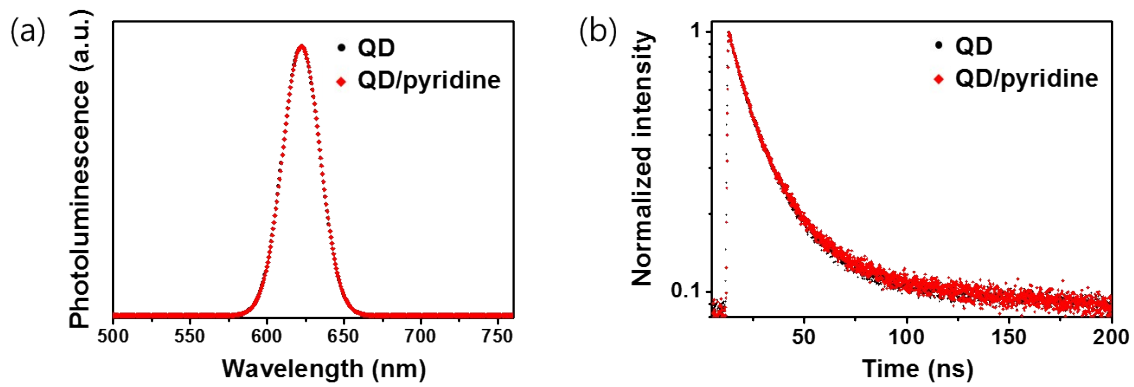

**Figure S2.** (a) Photoluminescence (PL), (b) PL-decay dynamics of QD films with original surface ligand (QD, black circle) and partial pyridine ligand (QD/pyridine, red diamond).

**Table S1.** The fitting parameters of PL decay curves for QD and QD/pyridine films.

| Sample      | $\tau_1$ [ns] | $\tau_2$ [ns] | $B_1$   | $B_2$   | $R_1$  | $R_2$  | A       | $\chi^2$ | $\tau_{\text{average}}$ [ns] |
|-------------|---------------|---------------|---------|---------|--------|--------|---------|----------|------------------------------|
| QD          | 9.95          | 25.66         | 5583.89 | 3187.26 | 0.6366 | 0.3634 | 919.92  | 1.10     | 15.66                        |
| QD/pyridine | 10.19         | 29.98         | 5542.69 | 2457.29 | 0.6928 | 0.3072 | 1800.45 | 1.06     | 16.27                        |

The PL decay curves were fitted to a bi-exponential function.

$I(t) = A + B_1 \cdot e^{(-t/\tau_1)} + B_2 \cdot e^{(-t/\tau_2)}$ ,  $R_i$  is the relative ratio factor which is calculated by  $R_i = B_i / (B_1 + B_2)$ .  $\tau_{\text{average}}$  is the average lifetime which was calculated according to  $\tau_{\text{average}} = R_1\tau_1 + R_2\tau_2$ .

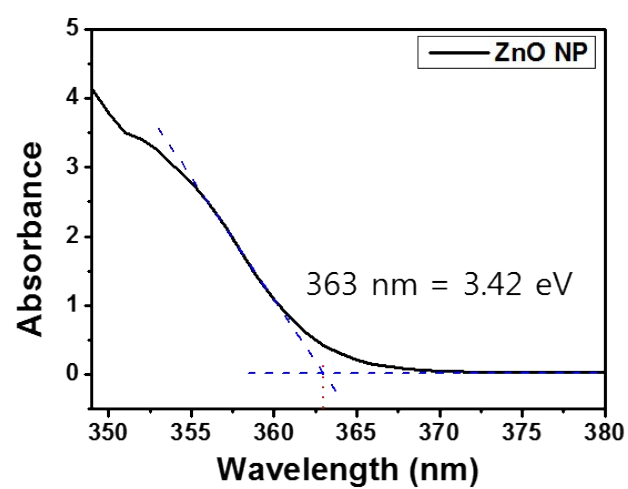

**Figure S3.** Absorption spectrum of ZnO nanoparticles in EtOH. The estimated optical band gap is 3.42 eV.

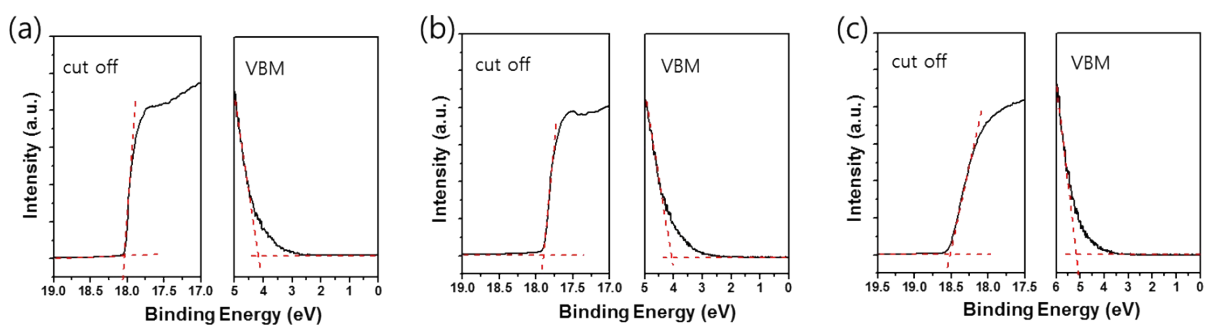

**Figure S4.** Ultraviolet photoelectron spectra of (a) red-, (b) green-, and (c) blue-emitting quantum dot films.

**Table S2.** Determination of the Fermi levels and HOMO levels for red (R)-, green (G)-, and blue (B)-emitting quantum dots (QDs) from the ultraviolet photoelectron spectroscopy data.

|                                                                        |
|------------------------------------------------------------------------|
| RQDs                                                                   |
| $ E_F  =  21.2 \text{ eV} - 18.1 \text{ eV}  =  3.1 \text{ eV} $       |
| $E_{\text{HOMO}} = -3.1 \text{ eV} - 4.2 \text{ eV} = -7.3 \text{ eV}$ |
| GQDs                                                                   |
| $ E_F  =  21.2 \text{ eV} - 17.9 \text{ eV}  =  3.3 \text{ eV} $       |
| $E_{\text{HOMO}} = -3.3 \text{ eV} - 4.0 \text{ eV} = -7.3 \text{ eV}$ |
| BQDs                                                                   |
| $ E_F  =  21.2 \text{ eV} - 18.5 \text{ eV}  =  2.7 \text{ eV} $       |
| $E_{\text{HOMO}} = -2.7 \text{ eV} - 5.1 \text{ eV} = -7.8 \text{ eV}$ |

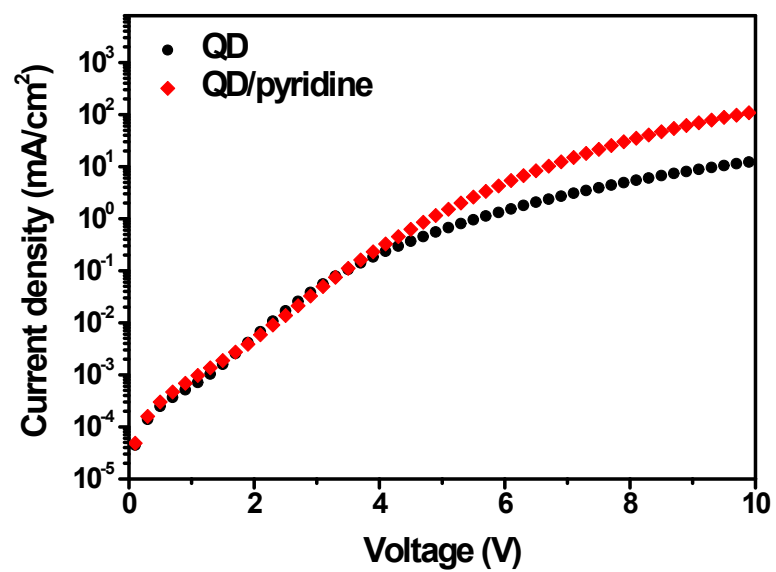

**Figure S5.** Current density-voltage (J-V) characteristics of hole-only devices based on QDs with original surface ligand (QD, black circle) and partial pyridine ligand (QD/pyridine, red diamond)



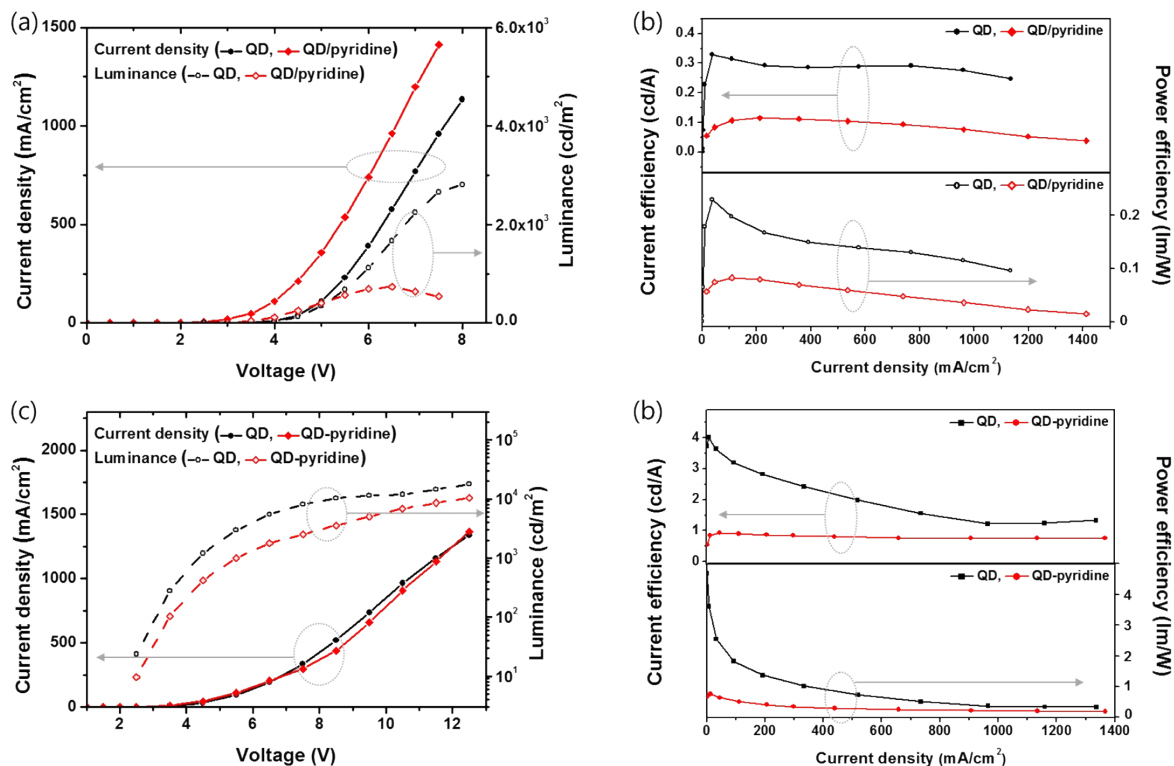

**Figure S6.** Current density-voltage-luminance (J-V-L) characteristics of the (a) conventional QD-LEDs for QDs with original surface ligands (QD) and partially pyridine-functionalized QDs (QD/pyridine), (c) inverted QD-LEDs for QDs with original surface ligands (QD) and pyridine functionalized QDs in solution states (QD-pyridine). Current efficiency and power efficiency as a function of current density for (b) conventional QD-LEDs for QDs with original surface ligands (QD) and partially pyridine-functionalized QDs (QD/pyridine), (d) inverted QD-LEDs for QDs with original surface ligands (QD) and pyridine functionalized QDs in solution states (QD-pyridine).
